# Supplementary material for: Life course factors associated with metabolically healthy obesity: a protocol for the systematic review of longitudinal studies
Source: Springer Nature journal article supplement (doi:10.1186/s13643-018-0713-x), 2018-03-27
Supplement: MOESM3 [file 15571662]

### **Additional file 3**

#### **Figure S3.** Search Strategy, Web of Science via Thomson Reuters

1. metabolic\*
2. cardiometabolic\*
3. health\*
4. unhealth\*
5. normal
6. abnormal
7. benign
8. "at-risk"
9. obes\*
10. MHO
11. "BMI"
12. "WHR"
13. "waist circumference"
14. "body composition"
15. abdominal
16. visceral
17. adipos\*
18. fat\*
19. muscle
20. weight
21. height
22. "body size trajector\*\*"
23. "birth weight"
24. birthweight
25. growth
26. "early onset obes\*\*"
27. pubert\*
28. menarch\*
29. smok\*
30. diet\*
31. alcohol\*

32. "physical activit\*"
33. exercis\*
34. fit\*
35. sedentary
36. psychosocial
37. stress\*
38. adversity
39. adverse experience\*
40. maltreatment
41. anxiety
42. depress\*
43. socioeconomic\*
44. socio-economic\*
45. social occupation\* class
46. income
47. education
48. cortisol
49. Limit to English Language
50. Limit to article document types
51. Limit to publications between 1960-2017
52. 1 or 2 NEAR/3 3 or 4 or 5 or 6 or 7 or 8 NEAR/3 9 (Search Title, Abstract, Key words)
53. 9 and 10 (Search Title, Abstract, Key words)
54. 11 or 12 or 13 or 14 or 15 or 16 or 17 or 18 or 19 or 20 or 21 or 22 or 23 or 24 or 25 or 26 or 27 or 28 or 29 or 30 or 31 or 32 or 33 or 34 or 35 or 36 or 37 or 38 or 39 or 40 or 41 or 42 or 43 or 44 or 45 or 46 or 47 or 48 (Field searched Title, Abstract, Key words)
55. 52 or 53
56. 49 and 50 and 51
57. 54 and 55 and 56

**Figure 1** represents the search strategy used, whereby 1- 48 represent all the key-words used in the search, 52-54 represent how the key words were organised into separate fields, 55 represents how the separate were fields were merged to create

*another search field, 56 represents the restrictions grouped, and 57 represents how the separate fields were combined to formulate the final search in addition to the restrictions that were selected when running the search.*
