# Supplementary material for: Life course factors associated with metabolically healthy obesity: a protocol for the systematic review of longitudinal studies
Source: Springer Nature journal article supplement (doi:10.1186/s13643-018-0713-x), 2018-03-27
Supplement: MOESM4 [file 15571662]

**Additional file 4.** Data extraction form

| <b>Citation Details</b> <ul style="list-style-type: none"> <li>• Title</li> <li>• Year of publication</li> <li>• Authors</li> <li>• Study ID</li> <li>• Pubmed ID</li> <li>• Country of publication</li> </ul> | <b>Study Details</b> <ul style="list-style-type: none"> <li>• Design</li> <li>• Time</li> <li>• Duration</li> <li>• Setting</li> <li>• Sample size</li> </ul> | <b>Participants details</b> <ul style="list-style-type: none"> <li>• Sample size</li> <li>• Age range</li> <li>• % male and female</li> <li>• Ethnicity</li> <li>• % drop out</li> </ul> | <b>Exposure(s) variable details</b> <ul style="list-style-type: none"> <li>• Exposure type</li> <li>• Measurement type</li> <li>• Time(s) and number of measurements</li> <li>• Categorisation criteria (if applicable)</li> </ul> | <b>Outcome(s) Variable details</b> <ul style="list-style-type: none"> <li>• Exposure type</li> <li>• Measurement type</li> <li>• Time(s) and number of measurements</li> <li>• Categorisation criteria (if applicable)</li> </ul> | <b>Statistical analyses</b> <ul style="list-style-type: none"> <li>• Analysis used</li> <li>• Association</li> <li>• Covariates adjusted for</li> <li>• Mediating factors</li> <li>• Results</li> </ul> |
|----------------------------------------------------------------------------------------------------------------------------------------------------------------------------------------------------------------|---------------------------------------------------------------------------------------------------------------------------------------------------------------|------------------------------------------------------------------------------------------------------------------------------------------------------------------------------------------|------------------------------------------------------------------------------------------------------------------------------------------------------------------------------------------------------------------------------------|-----------------------------------------------------------------------------------------------------------------------------------------------------------------------------------------------------------------------------------|---------------------------------------------------------------------------------------------------------------------------------------------------------------------------------------------------------|
|                                                                                                                                                                                                                |                                                                                                                                                               |                                                                                                                                                                                          |                                                                                                                                                                                                                                    |                                                                                                                                                                                                                                   |                                                                                                                                                                                                         |
|                                                                                                                                                                                                                |                                                                                                                                                               |                                                                                                                                                                                          |                                                                                                                                                                                                                                    |                                                                                                                                                                                                                                   |                                                                                                                                                                                                         |
|                                                                                                                                                                                                                |                                                                                                                                                               |                                                                                                                                                                                          |                                                                                                                                                                                                                                    |                                                                                                                                                                                                                                   |                                                                                                                                                                                                         |
|                                                                                                                                                                                                                |                                                                                                                                                               |                                                                                                                                                                                          |                                                                                                                                                                                                                                    |                                                                                                                                                                                                                                   |                                                                                                                                                                                                         |
