# Supplementary material for: Life course factors associated with metabolically healthy obesity: a protocol for the systematic review of longitudinal studies
Source: Springer Nature journal article supplement (doi:10.1186/s13643-018-0713-x), 2018-03-27
Supplement: MOESM6 [file 15571662]

## Additional file 6. Quality Assessment form

| Study ID         | A.1                                                                                                              | A.2                                                                              | A.3                                    | A.4                                                               | B.1                                             | C.1                                                     | C.2                                         | C.3                                     | Score                                                                                                                                  |
|------------------|------------------------------------------------------------------------------------------------------------------|----------------------------------------------------------------------------------|----------------------------------------|-------------------------------------------------------------------|-------------------------------------------------|---------------------------------------------------------|---------------------------------------------|-----------------------------------------|----------------------------------------------------------------------------------------------------------------------------------------|
| Citation details | Method of derivation of the cohort and details on the representativeness of the cohort of the source population. | Details on representativeness of the analysis sample of the full initial cohort. | Details on ascertainment of exposures. | Details on demonstration of presence/absence outcome at baseline. | Details on main analysis confounder adjustment. | Details on ascertainment of MHO/MetS in an obese group. | Details on follow-up duration of the study. | Details on the follow-up of the cohort. | Section A:<br>1)NS/(*)<br>2)NS/(*)<br>3)NS/(*)<br>4)NS/(*)<br>Section B:<br>1)NS/(*)<br>Section C:<br>1)NS/(*)<br>2)NS/(*)<br>3)NS/(*) |
|                  | a)/b)/c)/d)/e)<br>-NS/(*)                                                                                        | a)/b)/c)<br>-NS/(*)                                                              | a)/b)/c)/d)/e)/f)/g)<br>-NS/(*)        | a)/b)/c)<br>-NS/(*)                                               | a)/b)/c)<br>-NS/(*)                             | a)/b)/c)/d)/e)<br>-NS/(*)                               | a)/b)/c) –<br>NS/(*)                        | a)/b)/c)/d)/e)<br>-NS/(*)               | Quality:<br>Poor/fair/Good                                                                                                             |
