# Supplementary material for: Life course factors associated with metabolically healthy obesity: a protocol for the systematic review of longitudinal studies
Source: Springer Nature journal article supplement (doi:10.1186/s13643-018-0713-x), 2018-03-27
Supplement: MOESM7 [file 15571662]

## PRISMA-P 2015 Checklist

This checklist has been adapted for use with protocol submissions to *Systematic Reviews* from Table 3 in Moher D et al: Preferred reporting items for systematic review and meta-analysis protocols (PRISMA-P) 2015 statement. *Systematic Reviews* 2015 4:1

| Section/topic                     | #  | Checklist item                                                                                                                                                                                  | Information reported       |                            | Line number(s)   |
|-----------------------------------|----|-------------------------------------------------------------------------------------------------------------------------------------------------------------------------------------------------|----------------------------|----------------------------|------------------|
|                                   |    |                                                                                                                                                                                                 | Yes                        | No                         |                  |
| <b>ADMINISTRATIVE INFORMATION</b> |    |                                                                                                                                                                                                 |                            |                            |                  |
| <b>Title</b>                      |    |                                                                                                                                                                                                 |                            |                            |                  |
| Identification                    | 1a | Identify the report as a protocol of a systematic review                                                                                                                                        | X <input type="checkbox"/> | <input type="checkbox"/>   | 1                |
| Update                            | 1b | If the protocol is for an update of a previous systematic review, identify as such                                                                                                              | <input type="checkbox"/>   | X <input type="checkbox"/> | -                |
| <b>Registration</b>               | 2  | If registered, provide the name of the registry (e.g., PROSPERO) and registration number in the Abstract                                                                                        | X <input type="checkbox"/> | <input type="checkbox"/>   | 77               |
| <b>Authors</b>                    |    |                                                                                                                                                                                                 |                            |                            |                  |
| Contact                           | 3a | Provide name, institutional affiliation, and e-mail address of all protocol authors; provide physical mailing address of corresponding author                                                   | X <input type="checkbox"/> | <input type="checkbox"/>   | 9-25             |
| Contributions                     | 3b | Describe contributions of protocol authors and identify the guarantor of the review                                                                                                             | X <input type="checkbox"/> | <input type="checkbox"/>   | 357-360          |
| <b>Amendments</b>                 | 4  | If the protocol represents an amendment of a previously completed or published protocol, identify as such and list changes; otherwise, state plan for documenting important protocol amendments | X <input type="checkbox"/> | <input type="checkbox"/>   | 304-306          |
| <b>Support</b>                    |    |                                                                                                                                                                                                 |                            |                            |                  |
| Sources                           | 5a | Indicate sources of financial or other support for the review                                                                                                                                   | X <input type="checkbox"/> | <input type="checkbox"/>   | 351-355, 362-373 |
| Sponsor                           | 5b | Provide name for the review funder and/or sponsor                                                                                                                                               | X <input type="checkbox"/> | <input type="checkbox"/>   | 351-355          |
| Role of sponsor/funder            | 5c | Describe roles of funder(s), sponsor(s), and/or institution(s), if any, in developing the protocol                                                                                              | X <input type="checkbox"/> | <input type="checkbox"/>   | 351-355          |
| <b>INTRODUCTION</b>               |    |                                                                                                                                                                                                 |                            |                            |                  |
| <b>Rationale</b>                  | 6  | Describe the rationale for the review in the context of what is already known                                                                                                                   | X <input type="checkbox"/> | <input type="checkbox"/>   | 93-148           |
| <b>Objectives</b>                 | 7  | Provide an explicit statement of the question(s) the review will address with reference to participants, interventions, comparators, and outcomes (PICO)                                        | X <input type="checkbox"/> | <input type="checkbox"/>   | 145-148          |

| Section/topic                             | #   | Checklist item                                                                                                                                                                                                                              | Information reported       |                            | Line number(s)   |
|-------------------------------------------|-----|---------------------------------------------------------------------------------------------------------------------------------------------------------------------------------------------------------------------------------------------|----------------------------|----------------------------|------------------|
|                                           |     |                                                                                                                                                                                                                                             | Yes                        | No                         |                  |
| <b>METHODS</b>                            |     |                                                                                                                                                                                                                                             |                            |                            |                  |
| <b>Eligibility criteria</b>               | 8   | Specify the study characteristics (e.g., PICO, study design, setting, time frame) and report characteristics (e.g., years considered, language, publication status) to be used as criteria for eligibility for the review                   | X <input type="checkbox"/> | <input type="checkbox"/>   | 186-227          |
| <b>Information sources</b>                | 9   | Describe all intended information sources (e.g., electronic databases, contact with study authors, trial registers, or other grey literature sources) with planned dates of coverage                                                        | X <input type="checkbox"/> | <input type="checkbox"/>   | 154-173, 231-252 |
| <b>Search strategy</b>                    | 10  | Present draft of search strategy to be used for at least one electronic database, including planned limits, such that it could be repeated                                                                                                  | X <input type="checkbox"/> | <input type="checkbox"/>   | 154-173, 231-252 |
| <b>STUDY RECORDS</b>                      |     |                                                                                                                                                                                                                                             |                            |                            |                  |
| Data management                           | 11a | Describe the mechanism(s) that will be used to manage records and data throughout the review                                                                                                                                                | X <input type="checkbox"/> | <input type="checkbox"/>   | 168-173, 234     |
| Selection process                         | 11b | State the process that will be used for selecting studies (e.g., two independent reviewers) through each phase of the review (i.e., screening, eligibility, and inclusion in meta-analysis)                                                 | X <input type="checkbox"/> | <input type="checkbox"/>   | 236-252          |
| Data collection process                   | 11c | Describe planned method of extracting data from reports (e.g., piloting forms, done independently, in duplicate), any processes for obtaining and confirming data from investigators                                                        | X <input type="checkbox"/> | <input type="checkbox"/>   | 254-258          |
| <b>Data items</b>                         | 12  | List and define all variables for which data will be sought (e.g., PICO items, funding sources), any pre-planned data assumptions and simplifications                                                                                       | X <input type="checkbox"/> | <input type="checkbox"/>   | 254-255          |
| <b>Outcomes and prioritization</b>        | 13  | List and define all outcomes for which data will be sought, including prioritization of main and additional outcomes, with rationale                                                                                                        | X <input type="checkbox"/> | <input type="checkbox"/>   | 204-277          |
| <b>Risk of bias in individual studies</b> | 14  | Describe anticipated methods for assessing risk of bias of individual studies, including whether this will be done at the outcome or study level, or both; state how this information will be used in data synthesis                        | X <input type="checkbox"/> | <input type="checkbox"/>   | 260-279          |
| <b>DATA</b>                               |     |                                                                                                                                                                                                                                             |                            |                            |                  |
| <b>Synthesis</b>                          | 15a | Describe criteria under which study data will be quantitatively synthesized                                                                                                                                                                 | X <input type="checkbox"/> | <input type="checkbox"/>   | 283-286          |
|                                           | 15b | If data are appropriate for quantitative synthesis, describe planned summary measures, methods of handling data, and methods of combining data from studies, including any planned exploration of consistency (e.g., $I^2$ , Kendall's tau) | <input type="checkbox"/>   | X <input type="checkbox"/> | -                |
|                                           | 15c | Describe any proposed additional analyses (e.g., sensitivity or subgroup analyses, meta-regression)                                                                                                                                         | <input type="checkbox"/>   | X <input type="checkbox"/> | -                |
|                                           | 15d | If quantitative synthesis is not appropriate, describe the type of summary planned                                                                                                                                                          | X <input type="checkbox"/> | <input type="checkbox"/>   | 281-299          |

| Section/topic                            | #  | Checklist item                                                                                                              | Information reported       |                            | Line number(s) |
|------------------------------------------|----|-----------------------------------------------------------------------------------------------------------------------------|----------------------------|----------------------------|----------------|
|                                          |    |                                                                                                                             | Yes                        | No                         |                |
| <b>Meta-bias(es)</b>                     | 16 | Specify any planned assessment of meta-bias(es) (e.g., publication bias across studies, selective reporting within studies) | <input type="checkbox"/>   | X <input type="checkbox"/> | -              |
| <b>Confidence in cumulative evidence</b> | 17 | Describe how the strength of the body of evidence will be assessed (e.g., GRADE)                                            | X <input type="checkbox"/> | <input type="checkbox"/>   | 260-279        |
